# Supplementary material for: Risk assessment and data gap filling of toxicity of metal oxide nanoparticles (MeOx NPs) used in nanomedicines: a mechanistic QSAR approach
Source: Royal Society of Chemistry journal article supplement (doi:10.1039/d2en00303a), 2022-01-01
Supplement: d2en00303a1.pdf [file d2en00303a1.pdf]

**Table S1. Data set 1**

| CompNo | Metal oxides (MeOx) NPs        | log(1/LC50) | Predicted log(1/LC50) |
|--------|--------------------------------|-------------|-----------------------|
| *1     | ZnO                            | 3.32        | 2.96                  |
| 2      | TiO <sub>2</sub>               | 1.76        | 1.77                  |
| 3      | CoO                            | 2.83        | 2.74                  |
| 4      | In <sub>2</sub> O <sub>3</sub> | 2.92        | 2.70                  |
| *5     | NiO                            | 2.49        | 2.29                  |
| 6      | V <sub>2</sub> O <sub>3</sub>  | 2.24        | 2.53                  |
| *7     | Y <sub>2</sub> O <sub>3</sub>  | 2.21        | 1.92                  |
| 8      | Al <sub>2</sub> O <sub>3</sub> | 1.85        | 2.40                  |
| 9      | Bi <sub>2</sub> O <sub>3</sub> | 2.5         | 2.76                  |
| *10    | La <sub>2</sub> O <sub>3</sub> | 2.87        | 2.27                  |
| 11     | Sb <sub>2</sub> O <sub>3</sub> | 2.31        | 2.12                  |
| 12     | SiO <sub>2</sub>               | 2.12        | 1.93                  |
| 13     | SnO <sub>2</sub>               | 2.67        | 2.42                  |
| 14     | ZrO <sub>2</sub>               | 2.02        | 2.39                  |
| 15     | Cr <sub>2</sub> O <sub>3</sub> | 2.3         | 2.56                  |
| *16    | Fe <sub>2</sub> O <sub>3</sub> | 2.05        | 2.72                  |
| 17     | WO <sub>3</sub>                | 2.56        | 2.96                  |
| 18     | Mn <sub>2</sub> O <sub>3</sub> | 2.64        | 1.77                  |

\*Represents test set compounds

**Table S2. Data set 2**

| SL. No.   | Metal oxide name               |
|-----------|--------------------------------|
| <b>1.</b> | Al <sub>2</sub> O <sub>3</sub> |
| <b>2.</b> | Bi <sub>2</sub> O <sub>3</sub> |
| <b>3.</b> | Mn <sub>2</sub> O <sub>3</sub> |
| <b>4.</b> | NiO                            |
| <b>5.</b> | TiO <sub>2</sub>               |
| <b>6.</b> | WO <sub>3</sub>                |

|     |                                |
|-----|--------------------------------|
| 7.  | Y <sub>2</sub> O <sub>3</sub>  |
| 8.  | ZnO                            |
| 9.  | ZrO <sub>2</sub>               |
| 10. | Fe <sub>2</sub> O <sub>3</sub> |
| 11. | In <sub>2</sub> O <sub>3</sub> |
| 12. | La <sub>2</sub> O <sub>3</sub> |
| 13. | Sb <sub>2</sub> O <sub>3</sub> |
| 14. | SnO <sub>2</sub>               |
| 15. | Cr <sub>2</sub> O <sub>3</sub> |

**Table S3. Details of the dataset 2.**

| No.   | PMID     | Material                       | Core Size | Hydrodynamic Size | Surface Charge | Assay Method | Cell Line | Dose | % Cell death | PChem score (Maximum score: 5) |
|-------|----------|--------------------------------|-----------|-------------------|----------------|--------------|-----------|------|--------------|--------------------------------|
| 1.    | 24983896 | Al <sub>2</sub> O <sub>3</sub> | 44        | 372.3             | -20.2          | CytoTox-Glo  | HaCaT     | 50   | 5.1          | 4.75                           |
| 2.    | 24983896 | Al <sub>2</sub> O <sub>3</sub> | 44        | 372.3             | -20.2          | CytoTox-Glo  | HaCaT     | 100  | 18.4         | 4.75                           |
| 3.    | 24983896 | Al <sub>2</sub> O <sub>3</sub> | 44        | 372.3             | -20.2          | CytoTox-Glo  | HaCaT     | 150  | 20.6         | 4.75                           |
| 4.    | 24983896 | Al <sub>2</sub> O <sub>3</sub> | 44        | 372.3             | -20.2          | CytoTox-Glo  | HaCaT     | 200  | 26.5         | 4.75                           |
| 5.    | 24983896 | Al <sub>2</sub> O <sub>3</sub> | 44        | 372.3             | -20.2          | CytoTox-Glo  | HaCaT     | 250  | 28           | 4.75                           |
| 6.    | 24983896 | Al <sub>2</sub> O <sub>3</sub> | 44        | 372.3             | -20.2          | CytoTox-Glo  | HaCaT     | 500  | 30.5         | 4.75                           |
| 7.    | 24983896 | Al <sub>2</sub> O <sub>3</sub> | 44        | 372.3             | -20.2          | CytoTox-Glo  | HaCaT     | 750  | 35.5         | 4.75                           |
| 8.    | 24983896 | Al <sub>2</sub> O <sub>3</sub> | 44        | 372.3             | -20.2          | CytoTox-Glo  | HaCaT     | 1000 | 47.6         | 4.75                           |
| 9.    | 24983896 | Al <sub>2</sub> O <sub>3</sub> | 44        | 372.3             | -20.2          | CytoTox-Glo  | HaCaT     | 1500 | 50.1         | 4.75                           |
| 10. * | 24983896 | Bi <sub>2</sub> O <sub>3</sub> | 90        | 2029              | -2.3           | CytoTox-Glo  | HaCaT     | 50   | 8.8          | 4.75                           |
| 11.   | 24983896 | Bi <sub>2</sub> O <sub>3</sub> | 90        | 2029              | -2.3           | CytoTox-Glo  | HaCaT     | 100  | 10.7         | 4.75                           |
| 12.   | 24983896 | Bi <sub>2</sub> O <sub>3</sub> | 90        | 2029              | -2.3           | CytoTox-Glo  | HaCaT     | 150  | 14.7         | 4.75                           |
| 13.   | 24983896 | Bi <sub>2</sub> O <sub>3</sub> | 90        | 2029              | -2.3           | CytoTox-Glo  | HaCaT     | 200  | 22.8         | 4.75                           |
| 14. * | 24983896 | Bi <sub>2</sub> O <sub>3</sub> | 90        | 2029              | -2.3           | CytoTox-Glo  | HaCaT     | 250  | 30.8         | 4.75                           |
| 15.   | 24983896 | Bi <sub>2</sub> O <sub>3</sub> | 90        | 2029              | -2.3           | CytoTox-Glo  | HaCaT     | 500  | 37           | 4.75                           |

|       |          |       |      |       |       |             |       |      |      |      |
|-------|----------|-------|------|-------|-------|-------------|-------|------|------|------|
| 16.   | 24983896 | Bi2O3 | 90   | 2029  | -2.3  | CytoTox-Glo | HaCaT | 750  | 36.7 | 4.75 |
| 17.   | 24983896 | Bi2O3 | 90   | 2029  | -2.3  | CytoTox-Glo | HaCaT | 1000 | 41.7 | 4.75 |
| 18. * | 24983896 | Bi2O3 | 90   | 2029  | -2.3  | CytoTox-Glo | HaCaT | 1500 | 50.1 | 4.75 |
| 19.   | 24983896 | Cr2O3 | 60   | 616.8 | 5.7   | CytoTox-Glo | HaCaT | 50   | 4.8  | 4.75 |
| 20.   | 24983896 | Cr2O3 | 60   | 616.8 | 5.7   | CytoTox-Glo | HaCaT | 100  | 6.6  | 4.75 |
| 21.   | 24983896 | Cr2O3 | 60   | 616.8 | 5.7   | CytoTox-Glo | HaCaT | 150  | 10.4 | 4.75 |
| 22. * | 24983896 | Cr2O3 | 60   | 616.8 | 5.7   | CytoTox-Glo | HaCaT | 200  | 13.2 | 4.75 |
| 23.   | 24983896 | Cr2O3 | 60   | 616.8 | 5.7   | CytoTox-Glo | HaCaT | 250  | 27.1 | 4.75 |
| 24. * | 24983896 | Cr2O3 | 60   | 616.8 | 5.7   | CytoTox-Glo | HaCaT | 500  | 29.6 | 4.75 |
| 25.   | 24983896 | Cr2O3 | 60   | 616.8 | 5.7   | CytoTox-Glo | HaCaT | 750  | 42   | 4.75 |
| 26.   | 24983896 | Cr2O3 | 60   | 616.8 | 5.7   | CytoTox-Glo | HaCaT | 1000 | 71.2 | 4.75 |
| 27.   | 24983896 | Cr2O3 | 60   | 616.8 | 5.7   | CytoTox-Glo | HaCaT | 1500 | 76.8 | 4.75 |
| 28.   | 24983896 | Fe2O3 | 32   | 297.6 | -18.1 | CytoTox-Glo | HaCaT | 50   | 7.6  | 4.75 |
| 29.   | 24983896 | Fe2O3 | 32   | 297.6 | -18.1 | CytoTox-Glo | HaCaT | 100  | 11.6 | 4.75 |
| 30.   | 24983896 | Fe2O3 | 32   | 297.6 | -18.1 | CytoTox-Glo | HaCaT | 150  | 13.2 | 4.75 |
| 31.   | 24983896 | Fe2O3 | 32   | 297.6 | -18.1 | CytoTox-Glo | HaCaT | 200  | 16.9 | 4.75 |
| 32. * | 24983896 | Fe2O3 | 32   | 297.6 | -18.1 | CytoTox-Glo | HaCaT | 250  | 19   | 4.75 |
| 33.   | 24983896 | Fe2O3 | 32   | 297.6 | -18.1 | CytoTox-Glo | HaCaT | 500  | 21.8 | 4.75 |
| 34.   | 24983896 | Fe2O3 | 32   | 297.6 | -18.1 | CytoTox-Glo | HaCaT | 750  | 23.4 | 4.75 |
| 35. * | 24983896 | Fe2O3 | 32   | 297.6 | -18.1 | CytoTox-Glo | HaCaT | 1000 | 26.8 | 4.75 |
| 36.   | 24983896 | Fe2O3 | 32   | 297.6 | -18.1 | CytoTox-Glo | HaCaT | 1500 | 50.7 | 4.75 |
| 37.   | 24983896 | In2O3 | 29.8 | 224.3 | -9.6  | CytoTox-Glo | HaCaT | 50   | -2   | 4.75 |
| 38.   | 24983896 | In2O3 | 29.8 | 224.3 | -9.6  | CytoTox-Glo | HaCaT | 100  | 6.6  | 4.75 |
| 39.   | 24983896 | In2O3 | 29.8 | 224.3 | -9.6  | CytoTox-Glo | HaCaT | 250  | 41.4 | 4.75 |
| 40.   | 24983896 | In2O3 | 29.8 | 224.3 | -9.6  | CytoTox-Glo | HaCaT | 500  | 63.4 | 4.75 |
| 41. * | 24983896 | In2O3 | 29.8 | 224.3 | -9.6  | CytoTox-Glo | HaCaT | 750  | 68.7 | 4.75 |
| 42. * | 24983896 | In2O3 | 29.8 | 224.3 | -9.6  | CytoTox-Glo | HaCaT | 1000 | 71.2 | 4.75 |
| 43.   | 24983896 | In2O3 | 29.8 | 224.3 | -9.6  | CytoTox-Glo | HaCaT | 1500 | 72.7 | 4.75 |
| 44.   | 24983896 | La2O3 | 45.6 | 672.9 | -12.8 | CytoTox-Glo | HaCaT | 50   | 2    | 4.75 |
| 45.   | 24983896 | La2O3 | 45.6 | 672.9 | -12.8 | CytoTox-Glo | HaCaT | 100  | 0.7  | 4.75 |
| 46.   | 24983896 | La2O3 | 45.6 | 672.9 | -12.8 | CytoTox-Glo | HaCaT | 250  | 48.2 | 4.75 |
| 47. * | 24983896 | La2O3 | 45.6 | 672.9 | -12.8 | CytoTox-Glo | HaCaT | 500  | 72.4 | 4.75 |

|       |          |       |      |       |       |             |       |      |      |      |
|-------|----------|-------|------|-------|-------|-------------|-------|------|------|------|
| 48.   | 24983896 | La2O3 | 45.6 | 672.9 | -12.8 | CytoTox-Glo | HaCaT | 750  | 65   | 4.75 |
| 49. * | 24983896 | La2O3 | 45.6 | 672.9 | -12.8 | CytoTox-Glo | HaCaT | 1000 | 65   | 4.75 |
| 50. * | 24983896 | La2O3 | 45.6 | 672.9 | -12.8 | CytoTox-Glo | HaCaT | 1500 | 80.8 | 4.75 |
| 51.   | 24983896 | Mn2O3 | 29.8 | 291.1 | -3    | CytoTox-Glo | HaCaT | 50   | 9.1  | 4.75 |
| 52.   | 24983896 | Mn2O3 | 29.8 | 291.1 | -3    | CytoTox-Glo | HaCaT | 100  | 17.5 | 4.75 |
| 53. * | 24983896 | Mn2O3 | 29.8 | 291.1 | -3    | CytoTox-Glo | HaCaT | 150  | 29.6 | 4.75 |
| 54.   | 24983896 | Mn2O3 | 29.8 | 291.1 | -3    | CytoTox-Glo | HaCaT | 200  | 41.1 | 4.75 |
| 55.   | 24983896 | Mn2O3 | 29.8 | 291.1 | -3    | CytoTox-Glo | HaCaT | 250  | 44.5 | 4.75 |
| 56. * | 24983896 | Mn2O3 | 29.8 | 291.1 | -3    | CytoTox-Glo | HaCaT | 500  | 49.1 | 4.75 |
| 57.   | 24983896 | Mn2O3 | 29.8 | 291.1 | -3    | CytoTox-Glo | HaCaT | 750  | 60.9 | 4.75 |
| 58.   | 24983896 | Mn2O3 | 29.8 | 291.1 | -3    | CytoTox-Glo | HaCaT | 1000 | 69.6 | 4.75 |
| 59.   | 24983896 | Mn2O3 | 29.8 | 291.1 | -3    | CytoTox-Glo | HaCaT | 1500 | 77   | 4.75 |
| 60.   | 24983896 | NiO   | 20   | 223.5 | -12.1 | CytoTox-Glo | HaCaT | 50   | -1   | 4.75 |
| 61.   | 24983896 | NiO   | 20   | 223.5 | -12.1 | CytoTox-Glo | HaCaT | 100  | -1   | 4.75 |
| 62.   | 24983896 | NiO   | 20   | 223.5 | -12.1 | CytoTox-Glo | HaCaT | 250  | 46.3 | 4.75 |
| 63. * | 24983896 | NiO   | 20   | 223.5 | -12.1 | CytoTox-Glo | HaCaT | 500  | 81.4 | 4.75 |
| 64.   | 24983896 | NiO   | 20   | 223.5 | -12.1 | CytoTox-Glo | HaCaT | 750  | 83.9 | 4.75 |
| 65. * | 24983896 | NiO   | 20   | 223.5 | -12.1 | CytoTox-Glo | HaCaT | 1000 | 84.8 | 4.75 |
| 66.   | 24983896 | NiO   | 20   | 223.5 | -12.1 | CytoTox-Glo | HaCaT | 1500 | 86.4 | 4.75 |
| 67. * | 24983896 | Sb2O3 | 150  | 640.3 | -13.3 | CytoTox-Glo | HaCaT | 50   | 6.9  | 4.75 |
| 68.   | 24983896 | Sb2O3 | 150  | 640.3 | -13.3 | CytoTox-Glo | HaCaT | 100  | 11.6 | 4.75 |
| 69.   | 24983896 | Sb2O3 | 150  | 640.3 | -13.3 | CytoTox-Glo | HaCaT | 150  | 15.3 | 4.75 |
| 70.   | 24983896 | Sb2O3 | 150  | 640.3 | -13.3 | CytoTox-Glo | HaCaT | 200  | 23.1 | 4.75 |
| 71. * | 24983896 | Sb2O3 | 150  | 640.3 | -13.3 | CytoTox-Glo | HaCaT | 250  | 26.2 | 4.75 |
| 72.   | 24983896 | Sb2O3 | 150  | 640.3 | -13.3 | CytoTox-Glo | HaCaT | 500  | 32.1 | 4.75 |
| 73.   | 24983896 | Sb2O3 | 150  | 640.3 | -13.3 | CytoTox-Glo | HaCaT | 750  | 34.6 | 4.75 |
| 74.   | 24983896 | Sb2O3 | 150  | 640.3 | -13.3 | CytoTox-Glo | HaCaT | 1000 | 42.3 | 4.75 |
| 75.   | 24983896 | Sb2O3 | 150  | 640.3 | -13.3 | CytoTox-Glo | HaCaT | 1500 | 53.5 | 4.75 |
| 76.   | 24983896 | SnO2  | 46.1 | 264.9 | -10.5 | CytoTox-Glo | HaCaT | 50   | 8.2  | 4.75 |
| 77.   | 24983896 | SnO2  | 46.1 | 264.9 | -10.5 | CytoTox-Glo | HaCaT | 100  | 13.2 | 4.75 |
| 78. * | 24983896 | SnO2  | 46.1 | 264.9 | -10.5 | CytoTox-Glo | HaCaT | 250  | 50.1 | 4.75 |
| 79.   | 24983896 | SnO2  | 46.1 | 264.9 | -10.5 | CytoTox-Glo | HaCaT | 500  | 56   | 4.75 |

|       |          |      |      |        |       |             |       |      |       |      |
|-------|----------|------|------|--------|-------|-------------|-------|------|-------|------|
| 80.   | 24983896 | SnO2 | 46.1 | 264.9  | -10.5 | CytoTox-Glo | HaCaT | 750  | 65.6  | 4.75 |
| 81. * | 24983896 | SnO2 | 46.1 | 264.9  | -10.5 | CytoTox-Glo | HaCaT | 1000 | 70.8  | 4.75 |
| 82.   | 24983896 | SnO2 | 46.1 | 264.9  | -10.5 | CytoTox-Glo | HaCaT | 1500 | 82    | 4.75 |
| 83.   | 24983896 | TiO2 | 42.3 | 1307   | -9.6  | CytoTox-Glo | HaCaT | 50   | 20.3  | 4.75 |
| 84.   | 24983896 | TiO2 | 42.3 | 1307   | -9.6  | CytoTox-Glo | HaCaT | 100  | 17.5  | 4.75 |
| 85.   | 24983896 | TiO2 | 42.3 | 1307   | -9.6  | CytoTox-Glo | HaCaT | 250  | 33.9  | 4.75 |
| 86.   | 24983896 | TiO2 | 42.3 | 1307   | -9.6  | CytoTox-Glo | HaCaT | 500  | 34.2  | 4.75 |
| 87.   | 24983896 | TiO2 | 42.3 | 1307   | -9.6  | CytoTox-Glo | HaCaT | 750  | 38.6  | 4.75 |
| 88. * | 24983896 | TiO2 | 42.3 | 1307   | -9.6  | CytoTox-Glo | HaCaT | 1000 | 39.2  | 4.75 |
| 89.   | 24983896 | TiO2 | 42.3 | 1307   | -9.6  | CytoTox-Glo | HaCaT | 1500 | 59.7  | 4.75 |
| 90.   | 24983896 | WO3  | 50   | 179.6  | -9.1  | CytoTox-Glo | HaCaT | 50   | -6    | 4.75 |
| 91.   | 24983896 | WO3  | 50   | 179.6  | -9.1  | CytoTox-Glo | HaCaT | 100  | -4    | 4.75 |
| 92.   | 24983896 | WO3  | 50   | 179.6  | -9.1  | CytoTox-Glo | HaCaT | 250  | 33.9  | 4.75 |
| 93. * | 24983896 | WO3  | 50   | 179.6  | -9.1  | CytoTox-Glo | HaCaT | 500  | 47.9  | 4.75 |
| 94.   | 24983896 | WO3  | 50   | 179.6  | -9.1  | CytoTox-Glo | HaCaT | 750  | 48.5  | 4.75 |
| 95. * | 24983896 | WO3  | 50   | 179.6  | -9.1  | CytoTox-Glo | HaCaT | 1000 | 50.7  | 4.75 |
| 96.   | 24983896 | WO3  | 50   | 179.6  | -9.1  | CytoTox-Glo | HaCaT | 1500 | 61.5  | 4.75 |
| 97.   | 24983896 | Y2O3 | 38   | 1222.9 | -10.7 | CytoTox-Glo | HaCaT | 50   | -1    | 4.75 |
| 98.   | 24983896 | Y2O3 | 38   | 1222.9 | -10.7 | CytoTox-Glo | HaCaT | 100  | 3.5   | 4.75 |
| 99.   | 24983896 | Y2O3 | 38   | 1222.9 | -10.7 | CytoTox-Glo | HaCaT | 250  | 31.8  | 4.75 |
| 100.  | 24983896 | Y2O3 | 38   | 1222.9 | -10.7 | CytoTox-Glo | HaCaT | 500  | 37.7  | 4.75 |
| 101.  | 24983896 | Y2O3 | 38   | 1222.9 | -10.7 | CytoTox-Glo | HaCaT | 750  | 42    | 4.75 |
| 102.  | 24983896 | Y2O3 | 38   | 1222.9 | -10.7 | CytoTox-Glo | HaCaT | 1000 | 42.6  | 4.75 |
| 103.  | 24983896 | Y2O3 | 38   | 1222.9 | -10.7 | CytoTox-Glo | HaCaT | 1500 | 54.4  | 4.75 |
| 104.  | 24983896 | ZnO  | 71   | 188.9  | -10.8 | CytoTox-Glo | HaCaT | 50   | 66.2  | 4.75 |
| 105.  | 24983896 | ZnO  | 71   | 188.9  | -10.8 | CytoTox-Glo | HaCaT | 100  | 73.3  | 4.75 |
| 106.  | 24983896 | ZnO  | 71   | 188.9  | -10.8 | CytoTox-Glo | HaCaT | 250  | 87.9  | 4.75 |
| 107.  | 24983896 | ZnO  | 71   | 188.9  | -10.8 | CytoTox-Glo | HaCaT | 500  | 92.6  | 4.75 |
| 108.  | 24983896 | ZnO  | 71   | 188.9  | -10.8 | CytoTox-Glo | HaCaT | 750  | 98.1  | 4.75 |
| 109.  | 24983896 | ZnO  | 71   | 188.9  | -10.8 | CytoTox-Glo | HaCaT | 1000 | 99.07 | 4.75 |
| 110.  | 24983896 | ZnO  | 71   | 188.9  | -10.8 | CytoTox-Glo | HaCaT | 1500 | 100   | 4.75 |
| 111.  | 24983896 | ZrO2 | 46.7 | 661.4  | -8.5  | CytoTox-Glo | HaCaT | 50   | 2.9   | 4.75 |

|      |          |      |      |       |      |             |       |      |      |      |
|------|----------|------|------|-------|------|-------------|-------|------|------|------|
| 112. | 24983896 | ZrO2 | 46.7 | 661.4 | -8.5 | CytoTox-Glo | HaCaT | 100  | 6.9  | 4.75 |
| 113. | 24983896 | ZrO2 | 46.7 | 661.4 | -8.5 | CytoTox-Glo | HaCaT | 250  | 26.5 | 4.75 |
| 114. | 24983896 | ZrO2 | 46.7 | 661.4 | -8.5 | CytoTox-Glo | HaCaT | 500  | 31.8 | 4.75 |
| 115. | 24983896 | ZrO2 | 46.7 | 661.4 | -8.5 | CytoTox-Glo | HaCaT | 750  | 33.9 | 4.75 |
| 116. | 24983896 | ZrO2 | 46.7 | 661.4 | -8.5 | CytoTox-Glo | HaCaT | 1000 | 51.6 | 4.75 |
| 117. | 24983896 | ZrO2 | 46.7 | 661.4 | -8.5 | CytoTox-Glo | HaCaT | 1500 | 57.5 | 4.75 |

\*Represent test set data points
