# Supplementary material for: Risk assessment and data gap filling of toxicity of metal oxide nanoparticles (MeOx NPs) used in nanomedicines: a mechanistic QSAR approach
Source: Royal Society of Chemistry journal article supplement (doi:10.1039/d2en00303a), 2022-01-01
Supplement: d2en00303a2.xlsx [file d2en00303a2.xlsx]

## Sheet: Sheet3
Sl no	CoreSize	HydrodynamicSize	SurfaceCharge	Dose	D1_Metals	D2_SemiMetals	D3_HeteroNonMetals	Metals_SumIP	SemiMetals_SumIP	Electrons_ActiveM	AtWt_ActiveM	MassNo_ActiveM	Neutons_ActiveM	IP_ActivM	X_ActivM	VWR_ActivM	Electrons_Activ_SM	AtWt_Activ_SM	MassNo_Activ_SM	Neutons_Activ_SM	IP_Activ_SM	X_Activ_SM	VWR_Activ_SM	Electrons_Activ_NM	AtWt_Activ_NM	MassNo_Activ_NM	Neutons_Activ_NM	IP_Activ_NM	X_Activ_NM	VWR_Activ_NM	SuM_Active_M_SM	SuMElectrons_Active_M_SM	SuMAtWt_Active_M_SM	SuMMassNo_Active_M_SM	SuMNeutons_Active_M_SM	Mol_wt	Nmetal	Noxygen	χ	∑χ	∑χ/nO	χox	Z_metal	Zv_metal	PN_metal	(Z-Zv)/Zv_metal	1/(PN-1)_metal	Valence	Metal alpha
1	44	372.3	-20.2	50	2	0	3	1154.8	0	13	26.982	27	14	577.4	1.5	0.143	0	0	0	0	0	0	0	8	15.999	16	8	1314	3.5	0.074	2	13	26.982	27	14	101.96	2	3	1.61	3.22	1.07333	3	13	3	3	3.33333	0.5	3	1.66667
2	44	372.3	-20.2	100	2	0	3	1154.8	0	13	26.982	27	14	577.4	1.5	0.143	0	0	0	0	0	0	0	8	15.999	16	8	1314	3.5	0.074	2	13	26.982	27	14	101.96	2	3	1.61	3.22	1.07333	3	13	3	3	3.33333	0.5	3	1.66667
3	44	372.3	-20.2	150	2	0	3	1154.8	0	13	26.982	27	14	577.4	1.5	0.143	0	0	0	0	0	0	0	8	15.999	16	8	1314	3.5	0.074	2	13	26.982	27	14	101.96	2	3	1.61	3.22	1.07333	3	13	3	3	3.33333	0.5	3	1.66667
4	44	372.3	-20.2	200	2	0	3	1154.8	0	13	26.982	27	14	577.4	1.5	0.143	0	0	0	0	0	0	0	8	15.999	16	8	1314	3.5	0.074	2	13	26.982	27	14	101.96	2	3	1.61	3.22	1.07333	3	13	3	3	3.33333	0.5	3	1.66667
5	44	372.3	-20.2	250	2	0	3	1154.8	0	13	26.982	27	14	577.4	1.5	0.143	0	0	0	0	0	0	0	8	15.999	16	8	1314	3.5	0.074	2	13	26.982	27	14	101.96	2	3	1.61	3.22	1.07333	3	13	3	3	3.33333	0.5	3	1.66667
6	44	372.3	-20.2	500	2	0	3	1154.8	0	13	26.982	27	14	577.4	1.5	0.143	0	0	0	0	0	0	0	8	15.999	16	8	1314	3.5	0.074	2	13	26.982	27	14	101.96	2	3	1.61	3.22	1.07333	3	13	3	3	3.33333	0.5	3	1.66667
7	44	372.3	-20.2	750	2	0	3	1154.8	0	13	26.982	27	14	577.4	1.5	0.143	0	0	0	0	0	0	0	8	15.999	16	8	1314	3.5	0.074	2	13	26.982	27	14	101.96	2	3	1.61	3.22	1.07333	3	13	3	3	3.33333	0.5	3	1.66667
8	44	372.3	-20.2	1000	2	0	3	1154.8	0	13	26.982	27	14	577.4	1.5	0.143	0	0	0	0	0	0	0	8	15.999	16	8	1314	3.5	0.074	2	13	26.982	27	14	101.96	2	3	1.61	3.22	1.07333	3	13	3	3	3.33333	0.5	3	1.66667
9	44	372.3	-20.2	1500	2	0	3	1154.8	0	13	26.982	27	14	577.4	1.5	0.143	0	0	0	0	0	0	0	8	15.999	16	8	1314	3.5	0.074	2	13	26.982	27	14	101.96	2	3	1.61	3.22	1.07333	3	13	3	3	3.33333	0.5	3	1.66667
10	90	2029	-2.3	50	2	0	3	1406	0	83	208.98	209	126	703	1.9	0.152	0	0	0	0	0	0	0	8	15.999	16	8	1314	3.5	0.074	2	83	208.98	209	126	465.958	2	3	2.02	4.04	1.34667	3	83	5	6	15.6	0.2	5	3.12
11	90	2029	-2.3	100	2	0	3	1406	0	83	208.98	209	126	703	1.9	0.152	0	0	0	0	0	0	0	8	15.999	16	8	1314	3.5	0.074	2	83	208.98	209	126	465.958	2	3	2.02	4.04	1.34667	3	83	5	6	15.6	0.2	5	3.12
12	90	2029	-2.3	150	2	0	3	1406	0	83	208.98	209	126	703	1.9	0.152	0	0	0	0	0	0	0	8	15.999	16	8	1314	3.5	0.074	2	83	208.98	209	126	465.958	2	3	2.02	4.04	1.34667	3	83	5	6	15.6	0.2	5	3.12
13	90	2029	-2.3	200	2	0	3	1406	0	83	208.98	209	126	703	1.9	0.152	0	0	0	0	0	0	0	8	15.999	16	8	1314	3.5	0.074	2	83	208.98	209	126	465.958	2	3	2.02	4.04	1.34667	3	83	5	6	15.6	0.2	5	3.12
14	90	2029	-2.3	250	2	0	3	1406	0	83	208.98	209	126	703	1.9	0.152	0	0	0	0	0	0	0	8	15.999	16	8	1314	3.5	0.074	2	83	208.98	209	126	465.958	2	3	2.02	4.04	1.34667	3	83	5	6	15.6	0.2	5	3.12
15	90	2029	-2.3	500	2	0	3	1406	0	83	208.98	209	126	703	1.9	0.152	0	0	0	0	0	0	0	8	15.999	16	8	1314	3.5	0.074	2	83	208.98	209	126	465.958	2	3	2.02	4.04	1.34667	3	83	5	6	15.6	0.2	5	3.12
16	90	2029	-2.3	750	2	0	3	1406	0	83	208.98	209	126	703	1.9	0.152	0	0	0	0	0	0	0	8	15.999	16	8	1314	3.5	0.074	2	83	208.98	209	126	465.958	2	3	2.02	4.04	1.34667	3	83	5	6	15.6	0.2	5	3.12
17	90	2029	-2.3	1000	2	0	3	1406	0	83	208.98	209	126	703	1.9	0.152	0	0	0	0	0	0	0	8	15.999	16	8	1314	3.5	0.074	2	83	208.98	209	126	465.958	2	3	2.02	4.04	1.34667	3	83	5	6	15.6	0.2	5	3.12
18	90	2029	-2.3	1500	2	0	3	1406	0	83	208.98	209	126	703	1.9	0.152	0	0	0	0	0	0	0	8	15.999	16	8	1314	3.5	0.074	2	83	208.98	209	126	465.958	2	3	2.02	4.04	1.34667	3	83	5	6	15.6	0.2	5	3.12
19	60	616.8	5.7	50	2	0	3	1302.2	0	24	51.996	52	28	651.1	1.6	0.127	0	0	0	0	0	0	0	8	15.999	16	8	1314	3.5	0.074	2	24	51.996	52	28	151.989	2	3	1.66	3.32	1.10667	3	24	1	4	23	0.333333	6	7.66667
20	60	616.8	5.7	100	2	0	3	1302.2	0	24	51.996	52	28	651.1	1.6	0.127	0	0	0	0	0	0	0	8	15.999	16	8	1314	3.5	0.074	2	24	51.996	52	28	151.989	2	3	1.66	3.32	1.10667	3	24	1	4	23	0.333333	6	7.66667
21	60	616.8	5.7	150	2	0	3	1302.2	0	24	51.996	52	28	651.1	1.6	0.127	0	0	0	0	0	0	0	8	15.999	16	8	1314	3.5	0.074	2	24	51.996	52	28	151.989	2	3	1.66	3.32	1.10667	3	24	1	4	23	0.333333	6	7.66667
22	60	616.8	5.7	200	2	0	3	1302.2	0	24	51.996	52	28	651.1	1.6	0.127	0	0	0	0	0	0	0	8	15.999	16	8	1314	3.5	0.074	2	24	51.996	52	28	151.989	2	3	1.66	3.32	1.10667	3	24	1	4	23	0.333333	6	7.66667
23	60	616.8	5.7	250	2	0	3	1302.2	0	24	51.996	52	28	651.1	1.6	0.127	0	0	0	0	0	0	0	8	15.999	16	8	1314	3.5	0.074	2	24	51.996	52	28	151.989	2	3	1.66	3.32	1.10667	3	24	1	4	23	0.333333	6	7.66667
24	60	616.8	5.7	500	2	0	3	1302.2	0	24	51.996	52	28	651.1	1.6	0.127	0	0	0	0	0	0	0	8	15.999	16	8	1314	3.5	0.074	2	24	51.996	52	28	151.989	2	3	1.66	3.32	1.10667	3	24	1	4	23	0.333333	6	7.66667
25	60	616.8	5.7	750	2	0	3	1302.2	0	24	51.996	52	28	651.1	1.6	0.127	0	0	0	0	0	0	0	8	15.999	16	8	1314	3.5	0.074	2	24	51.996	52	28	151.989	2	3	1.66	3.32	1.10667	3	24	1	4	23	0.333333	6	7.66667
26	60	616.8	5.7	1000	2	0	3	1302.2	0	24	51.996	52	28	651.1	1.6	0.127	0	0	0	0	0	0	0	8	15.999	16	8	1314	3.5	0.074	2	24	51.996	52	28	151.989	2	3	1.66	3.32	1.10667	3	24	1	4	23	0.333333	6	7.66667
27	60	616.8	5.7	1500	2	0	3	1302.2	0	24	51.996	52	28	651.1	1.6	0.127	0	0	0	0	0	0	0	8	15.999	16	8	1314	3.5	0.074	2	24	51.996	52	28	151.989	2	3	1.66	3.32	1.10667	3	24	1	4	23	0.333333	6	7.66667
28	32	297.6	-18.1	50	2	0	3	1522	0	26	55.845	56	30	761	1.8	0.126	0	0	0	0	0	0	0	8	15.999	16	8	1314	3.5	0.074	2	26	55.845	56	30	159.687	2	3	1.83	3.66	1.22	3	26	2	4	12	0.333333	6	4
29	32	297.6	-18.1	100	2	0	3	1522	0	26	55.845	56	30	761	1.8	0.126	0	0	0	0	0	0	0	8	15.999	16	8	1314	3.5	0.074	2	26	55.845	56	30	159.687	2	3	1.83	3.66	1.22	3	26	2	4	12	0.333333	6	4
30	32	297.6	-18.1	150	2	0	3	1522	0	26	55.845	56	30	761	1.8	0.126	0	0	0	0	0	0	0	8	15.999	16	8	1314	3.5	0.074	2	26	55.845	56	30	159.687	2	3	1.83	3.66	1.22	3	26	2	4	12	0.333333	6	4
31	32	297.6	-18.1	200	2	0	3	1522	0	26	55.845	56	30	761	1.8	0.126	0	0	0	0	0	0	0	8	15.999	16	8	1314	3.5	0.074	2	26	55.845	56	30	159.687	2	3	1.83	3.66	1.22	3	26	2	4	12	0.333333	6	4
32	32	297.6	-18.1	250	2	0	3	1522	0	26	55.845	56	30	761	1.8	0.126	0	0	0	0	0	0	0	8	15.999	16	8	1314	3.5	0.074	2	26	55.845	56	30	159.687	2	3	1.83	3.66	1.22	3	26	2	4	12	0.333333	6	4
33	32	297.6	-18.1	500	2	0	3	1522	0	26	55.845	56	30	761	1.8	0.126	0	0	0	0	0	0	0	8	15.999	16	8	1314	3.5	0.074	2	26	55.845	56	30	159.687	2	3	1.83	3.66	1.22	3	26	2	4	12	0.333333	6	4
34	32	297.6	-18.1	750	2	0	3	1522	0	26	55.845	56	30	761	1.8	0.126	0	0	0	0	0	0	0	8	15.999	16	8	1314	3.5	0.074	2	26	55.845	56	30	159.687	2	3	1.83	3.66	1.22	3	26	2	4	12	0.333333	6	4
35	32	297.6	-18.1	1000	2	0	3	1522	0	26	55.845	56	30	761	1.8	0.126	0	0	0	0	0	0	0	8	15.999	16	8	1314	3.5	0.074	2	26	55.845	56	30	159.687	2	3	1.83	3.66	1.22	3	26	2	4	12	0.333333	6	4
36	32	297.6	-18.1	1500	2	0	3	1522	0	26	55.845	56	30	761	1.8	0.126	0	0	0	0	0	0	0	8	15.999	16	8	1314	3.5	0.074	2	26	55.845	56	30	159.687	2	3	1.83	3.66	1.22	3	26	2	4	12	0.333333	6	4
37	29.8	224.3	-9.6	50	2	0	3	1116.4	0	49	114.818	115	66	558.2	2	0.162	0	0	0	0	0	0	0	8	15.999	16	8	1314	3.5	0.074	2	49	114.818	115	66	277.633	2	3	1.78	3.56	1.18667	3	49	3	5	15.3333	0.25	3	3.83333
38	29.8	224.3	-9.6	100	2	0	3	1116.4	0	49	114.818	115	66	558.2	2	0.162	0	0	0	0	0	0	0	8	15.999	16	8	1314	3.5	0.074	2	49	114.818	115	66	277.633	2	3	1.78	3.56	1.18667	3	49	3	5	15.3333	0.25	3	3.83333
39	29.8	224.3	-9.6	250	2	0	3	1116.4	0	49	114.818	115	66	558.2	2	0.162	0	0	0	0	0	0	0	8	15.999	16	8	1314	3.5	0.074	2	49	114.818	115	66	277.633	2	3	1.78	3.56	1.18667	3	49	3	5	15.3333	0.25	3	3.83333
40	29.8	224.3	-9.6	500	2	0	3	1116.4	0	49	114.818	115	66	558.2	2	0.162	0	0	0	0	0	0	0	8	15.999	16	8	1314	3.5	0.074	2	49	114.818	115	66	277.633	2	3	1.78	3.56	1.18667	3	49	3	5	15.3333	0.25	3	3.83333
41	29.8	224.3	-9.6	750	2	0	3	1116.4	0	49	114.818	115	66	558.2	2	0.162	0	0	0	0	0	0	0	8	15.999	16	8	1314	3.5	0.074	2	49	114.818	115	66	277.633	2	3	1.78	3.56	1.18667	3	49	3	5	15.3333	0.25	3	3.83333
42	29.8	224.3	-9.6	1000	2	0	3	1116.4	0	49	114.818	115	66	558.2	2	0.162	0	0	0	0	0	0	0	8	15.999	16	8	1314	3.5	0.074	2	49	114.818	115	66	277.633	2	3	1.78	3.56	1.18667	3	49	3	5	15.3333	0.25	3	3.83333
43	29.8	224.3	-9.6	1500	2	0	3	1116.4	0	49	114.818	115	66	558.2	2	0.162	0	0	0	0	0	0	0	8	15.999	16	8	1314	3.5	0.074	2	49	114.818	115	66	277.633	2	3	1.78	3.56	1.18667	3	49	3	5	15.3333	0.25	3	3.83333
44	45.6	672.9	-12.8	50	2	0	3	1078	0	57	138.91	139	82	539	1.1	0.104	0	0	0	0	0	0	0	8	15.999	16	8	1314	3.5	0.074	2	57	138.91	139	82	325.808	2	3	1.1	2.2	0.733333	3	57	2	6	27.5	0.2	3	5.5
45	45.6	672.9	-12.8	100	2	0	3	1078	0	57	138.91	139	82	539	1.1	0.104	0	0	0	0	0	0	0	8	15.999	16	8	1314	3.5	0.074	2	57	138.91	139	82	325.808	2	3	1.1	2.2	0.733333	3	57	2	6	27.5	0.2	3	5.5
46	45.6	672.9	-12.8	250	2	0	3	1078	0	57	138.91	139	82	539	1.1	0.104	0	0	0	0	0	0	0	8	15.999	16	8	1314	3.5	0.074	2	57	138.91	139	82	325.808	2	3	1.1	2.2	0.733333	3	57	2	6	27.5	0.2	3	5.5
47	45.6	672.9	-12.8	500	2	0	3	1078	0	57	138.91	139	82	539	1.1	0.104	0	0	0	0	0	0	0	8	15.999	16	8	1314	3.5	0.074	2	57	138.91	139	82	325.808	2	3	1.1	2.2	0.733333	3	57	2	6	27.5	0.2	3	5.5
48	45.6	672.9	-12.8	750	2	0	3	1078	0	57	138.91	139	82	539	1.1	0.104	0	0	0	0	0	0	0	8	15.999	16	8	1314	3.5	0.074	2	57	138.91	139	82	325.808	2	3	1.1	2.2	0.733333	3	57	2	6	27.5	0.2	3	5.5
49	45.6	672.9	-12.8	1000	2	0	3	1078	0	57	138.91	139	82	539	1.1	0.104	0	0	0	0	0	0	0	8	15.999	16	8	1314	3.5	0.074	2	57	138.91	139	82	325.808	2	3	1.1	2.2	0.733333	3	57	2	6	27.5	0.2	3	5.5
50	45.6	672.9	-12.8	1500	2	0	3	1432	0	25	54.938	55	30	716	1.5	0.126	0	0	0	0	0	0	0	8	15.999	16	8	1314	3.5	0.074	2	25	54.938	55	30	157.873	2	3	1.55	3.1	1.03333	3	25	2	4	11.5	0.333333	7	3.83333
51	29.8	291.1	-3	50	2	0	3	1432	0	25	54.938	55	30	716	1.5	0.126	0	0	0	0	0	0	0	8	15.999	16	8	1314	3.5	0.074	2	25	54.938	55	30	157.873	2	3	1.55	3.1	1.03333	3	25	2	4	11.5	0.333333	7	3.83333
52	29.8	291.1	-3	100	2	0	3	1432	0	25	54.938	55	30	716	1.5	0.126	0	0	0	0	0	0	0	8	15.999	16	8	1314	3.5	0.074	2	25	54.938	55	30	157.873	2	3	1.55	3.1	1.03333	3	25	2	4	11.5	0.333333	7	3.83333
53	29.8	291.1	-3	150	2	0	3	1432	0	25	54.938	55	30	716	1.5	0.126	0	0	0	0	0	0	0	8	15.999	16	8	1314	3.5	0.074	2	25	54.938	55	30	157.873	2	3	1.55	3.1	1.03333	3	25	2	4	11.5	0.333333	7	3.83333
54	29.8	291.1	-3	200	2	0	3	1432	0	25	54.938	55	30	716	1.5	0.126	0	0	0	0	0	0	0	8	15.999	16	8	1314	3.5	0.074	2	25	54.938	55	30	157.873	2	3	1.55	3.1	1.03333	3	25	2	4	11.5	0.333333	7	3.83333
55	29.8	291.1	-3	250	2	0	3	1432	0	25	54.938	55	30	716	1.5	0.126	0	0	0	0	0	0	0	8	15.999	16	8	1314	3.5	0.074	2	25	54.938	55	30	157.873	2	3	1.55	3.1	1.03333	3	25	2	4	11.5	0.333333	7	3.83333
56	29.8	291.1	-3	500	2	0	3	1432	0	25	54.938	55	30	716	1.5	0.126	0	0	0	0	0	0	0	8	15.999	16	8	1314	3.5	0.074	2	25	54.938	55	30	157.873	2	3	1.55	3.1	1.03333	3	25	2	4	11.5	0.333333	7	3.83333
57	29.8	291.1	-3	750	2	0	3	1432	0	25	54.938	55	30	716	1.5	0.126	0	0	0	0	0	0	0	8	15.999	16	8	1314	3.5	0.074	2	25	54.938	55	30	157.873	2	3	1.55	3.1	1.03333	3	25	2	4	11.5	0.333333	7	3.83333
58	29.8	291.1	-3	1000	2	0	3	1432	0	25	54.938	55	30	716	1.5	0.126	0	0	0	0	0	0	0	8	15.999	16	8	1314	3.5	0.074	2	25	54.938	55	30	157.873	2	3	1.55	3.1	1.03333	3	25	2	4	11.5	0.333333	7	3.83333
59	29.8	291.1	-3	1500	2	0	3	1432	0	25	54.938	55	30	716	1.5	0.126	0	0	0	0	0	0	0	8	15.999	16	8	1314	3.5	0.074	2	25	54.938	55	30	157.873	2	3	1.55	3.1	1.03333	3	25	2	4	11.5	0.333333	7	3.83333
60	20	223.5	-12.1	50	1	0	1	735	0	28	58.6934	59	31	735	1.8	0.124	0	0	0	0	0	0	0	8	15.999	16	8	1314	3.5	0.074	1	28	58.6934	59	31	74.692	1	1	1.91	1.91	1.91	2	28	2	4	13	0.333333	4	4.33333
61	20	223.5	-12.1	100	1	0	1	735	0	28	58.6934	59	31	735	1.8	0.124	0	0	0	0	0	0	0	8	15.999	16	8	1314	3.5	0.074	1	28	58.6934	59	31	74.692	1	1	1.91	1.91	1.91	2	28	2	4	13	0.333333	4	4.33333
62	20	223.5	-12.1	250	1	0	1	735	0	28	58.6934	59	31	735	1.8	0.124	0	0	0	0	0	0	0	8	15.999	16	8	1314	3.5	0.074	1	28	58.6934	59	31	74.692	1	1	1.91	1.91	1.91	2	28	2	4	13	0.333333	4	4.33333
63	20	223.5	-12.1	500	1	0	1	735	0	28	58.6934	59	31	735	1.8	0.124	0	0	0	0	0	0	0	8	15.999	16	8	1314	3.5	0.074	1	28	58.6934	59	31	74.692	1	1	1.91	1.91	1.91	2	28	2	4	13	0.333333	4	4.33333
64	20	223.5	-12.1	750	1	0	1	735	0	28	58.6934	59	31	735	1.8	0.124	0	0	0	0	0	0	0	8	15.999	16	8	1314	3.5	0.074	1	28	58.6934	59	31	74.692	1	1	1.91	1.91	1.91	2	28	2	4	13	0.333333	4	4.33333
65	20	223.5	-12.1	1000	1	0	1	735	0	28	58.6934	59	31	735	1.8	0.124	0	0	0	0	0	0	0	8	15.999	16	8	1314	3.5	0.074	1	28	58.6934	59	31	74.692	1	1	1.91	1.91	1.91	2	28	2	4	13	0.333333	4	4.33333
66	20	223.5	-12.1	1500	1	0	1	735	0	28	58.6934	59	31	735	1.8	0.124	0	0	0	0	0	0	0	8	15.999	16	8	1314	3.5	0.074	1	28	58.6934	59	31	74.692	1	1	1.91	1.91	1.91	2	28	2	4	13	0.333333	4	4.33333
67	150	640.3	-13.3	50	0	2	3	0	1668	0	0	0	0	0	0	0	51	121.76	122	71	834	1.9	0.159	8	15.999	16	8	1314	3.5	0.074	2	51	121.76	122	71	291.517	2	3	2.05	4.1	1.36667	3	51	5	5	9.2	0.25	5	2.3
68	150	640.3	-13.3	100	0	2	3	0	1668	0	0	0	0	0	0	0	51	121.76	122	71	834	1.9	0.159	8	15.999	16	8	1314	3.5	0.074	2	51	121.76	122	71	291.517	2	3	2.05	4.1	1.36667	3	51	5	5	9.2	0.25	5	2.3
69	150	640.3	-13.3	150	0	2	3	0	1668	0	0	0	0	0	0	0	51	121.76	122	71	834	1.9	0.159	8	15.999	16	8	1314	3.5	0.074	2	51	121.76	122	71	291.517	2	3	2.05	4.1	1.36667	3	51	5	5	9.2	0.25	5	2.3
70	150	640.3	-13.3	200	0	2	3	0	1668	0	0	0	0	0	0	0	51	121.76	122	71	834	1.9	0.159	8	15.999	16	8	1314	3.5	0.074	2	51	121.76	122	71	291.517	2	3	2.05	4.1	1.36667	3	51	5	5	9.2	0.25	5	2.3
71	150	640.3	-13.3	250	0	2	3	0	1668	0	0	0	0	0	0	0	51	121.76	122	71	834	1.9	0.159	8	15.999	16	8	1314	3.5	0.074	2	51	121.76	122	71	291.517	2	3	2.05	4.1	1.36667	3	51	5	5	9.2	0.25	5	2.3
72	150	640.3	-13.3	500	0	2	3	0	1668	0	0	0	0	0	0	0	51	121.76	122	71	834	1.9	0.159	8	15.999	16	8	1314	3.5	0.074	2	51	121.76	122	71	291.517	2	3	2.05	4.1	1.36667	3	51	5	5	9.2	0.25	5	2.3
73	150	640.3	-13.3	750	0	2	3	0	1668	0	0	0	0	0	0	0	51	121.76	122	71	834	1.9	0.159	8	15.999	16	8	1314	3.5	0.074	2	51	121.76	122	71	291.517	2	3	2.05	4.1	1.36667	3	51	5	5	9.2	0.25	5	2.3
74	150	640.3	-13.3	1000	0	2	3	0	1668	0	0	0	0	0	0	0	51	121.76	122	71	834	1.9	0.159	8	15.999	16	8	1314	3.5	0.074	2	51	121.76	122	71	291.517	2	3	2.05	4.1	1.36667	3	51	5	5	9.2	0.25	5	2.3
75	150	640.3	-13.3	1500	0	2	3	0	1668	0	0	0	0	0	0	0	51	121.76	122	71	834	1.9	0.159	8	15.999	16	8	1314	3.5	0.074	2	51	121.76	122	71	291.517	2	3	2.05	4.1	1.36667	3	51	5	5	9.2	0.25	5	2.3
76	46.1	264.9	-10.5	50	1	0	2	708.4	0	50	118.71	119	69	708.4	1.8	0.162	0	0	0	0	0	0	0	8	15.999	16	8	1314	3.5	0.074	1	50	118.71	119	69	150.708	1	2	1.96	1.96	0.98	4	50	4	5	11.5	0.25	4	2.875
77	46.1	264.9	-10.5	100	1	0	2	708.4	0	50	118.71	119	69	708.4	1.8	0.162	0	0	0	0	0	0	0	8	15.999	16	8	1314	3.5	0.074	1	50	118.71	119	69	150.708	1	2	1.96	1.96	0.98	4	50	4	5	11.5	0.25	4	2.875
78	46.1	264.9	-10.5	250	1	0	2	708.4	0	50	118.71	119	69	708.4	1.8	0.162	0	0	0	0	0	0	0	8	15.999	16	8	1314	3.5	0.074	1	50	118.71	119	69	150.708	1	2	1.96	1.96	0.98	4	50	4	5	11.5	0.25	4	2.875
79	46.1	264.9	-10.5	500	1	0	2	708.4	0	50	118.71	119	69	708.4	1.8	0.162	0	0	0	0	0	0	0	8	15.999	16	8	1314	3.5	0.074	1	50	118.71	119	69	150.708	1	2	1.96	1.96	0.98	4	50	4	5	11.5	0.25	4	2.875
80	46.1	264.9	-10.5	750	1	0	2	708.4	0	50	118.71	119	69	708.4	1.8	0.162	0	0	0	0	0	0	0	8	15.999	16	8	1314	3.5	0.074	1	50	118.71	119	69	150.708	1	2	1.96	1.96	0.98	4	50	4	5	11.5	0.25	4	2.875
81	46.1	264.9	-10.5	1000	1	0	2	708.4	0	50	118.71	119	69	708.4	1.8	0.162	0	0	0	0	0	0	0	8	15.999	16	8	1314	3.5	0.074	1	50	118.71	119	69	150.708	1	2	1.96	1.96	0.98	4	50	4	5	11.5	0.25	4	2.875
82	46.1	264.9	-10.5	1500	1	0	2	708.4	0	50	118.71	119	69	708.4	1.8	0.162	0	0	0	0	0	0	0	8	15.999	16	8	1314	3.5	0.074	1	50	118.71	119	69	150.708	1	2	1.96	1.96	0.98	4	50	4	5	11.5	0.25	4	2.875
83	42.3	1307	-9.6	50	1	0	2	658	0	22	47.867	48	26	658	1.5	0.147	0	0	0	0	0	0	0	8	15.999	16	8	1314	3.5	0.074	1	22	47.867	48	26	79.865	1	2	1.54	1.54	0.77	4	22	2	4	10	0.333333	4	3.33333
84	42.3	1307	-9.6	100	1	0	2	658	0	22	47.867	48	26	658	1.5	0.147	0	0	0	0	0	0	0	8	15.999	16	8	1314	3.5	0.074	1	22	47.867	48	26	79.865	1	2	1.54	1.54	0.77	4	22	2	4	10	0.333333	4	3.33333
85	42.3	1307	-9.6	250	1	0	2	658	0	22	47.867	48	26	658	1.5	0.147	0	0	0	0	0	0	0	8	15.999	16	8	1314	3.5	0.074	1	22	47.867	48	26	79.865	1	2	1.54	1.54	0.77	4	22	2	4	10	0.333333	4	3.33333
86	42.3	1307	-9.6	500	1	0	2	658	0	22	47.867	48	26	658	1.5	0.147	0	0	0	0	0	0	0	8	15.999	16	8	1314	3.5	0.074	1	22	47.867	48	26	79.865	1	2	1.54	1.54	0.77	4	22	2	4	10	0.333333	4	3.33333
87	42.3	1307	-9.6	750	1	0	2	658	0	22	47.867	48	26	658	1.5	0.147	0	0	0	0	0	0	0	8	15.999	16	8	1314	3.5	0.074	1	22	47.867	48	26	79.865	1	2	1.54	1.54	0.77	4	22	2	4	10	0.333333	4	3.33333
88	42.3	1307	-9.6	1000	1	0	2	658	0	22	47.867	48	26	658	1.5	0.147	0	0	0	0	0	0	0	8	15.999	16	8	1314	3.5	0.074	1	22	47.867	48	26	79.865	1	2	1.54	1.54	0.77	4	22	2	4	10	0.333333	4	3.33333
89	42.3	1307	-9.6	1500	1	0	2	658	0	22	47.867	48	26	658	1.5	0.147	0	0	0	0	0	0	0	8	15.999	16	8	1314	3.5	0.074	1	22	47.867	48	26	79.865	1	2	1.54	1.54	0.77	4	22	2	4	10	0.333333	4	3.33333
90	50	179.6	-9.1	50	1	0	3	768.6	0	74	183.84	184	110	768.6	1.7	0.137	0	0	0	0	0	0	0	8	15.999	16	8	1314	3.5	0.074	1	74	183.84	184	110	231.84	1	3	2.36	2.36	0.786667	6	74	2	6	36	0.2	6	7.2
91	50	179.6	-9.1	100	1	0	3	768.6	0	74	183.84	184	110	768.6	1.7	0.137	0	0	0	0	0	0	0	8	15.999	16	8	1314	3.5	0.074	1	74	183.84	184	110	231.84	1	3	2.36	2.36	0.786667	6	74	2	6	36	0.2	6	7.2
92	50	179.6	-9.1	250	1	0	3	768.6	0	74	183.84	184	110	768.6	1.7	0.137	0	0	0	0	0	0	0	8	15.999	16	8	1314	3.5	0.074	1	74	183.84	184	110	231.84	1	3	2.36	2.36	0.786667	6	74	2	6	36	0.2	6	7.2
93	50	179.6	-9.1	500	1	0	3	768.6	0	74	183.84	184	110	768.6	1.7	0.137	0	0	0	0	0	0	0	8	15.999	16	8	1314	3.5	0.074	1	74	183.84	184	110	231.84	1	3	2.36	2.36	0.786667	6	74	2	6	36	0.2	6	7.2
94	50	179.6	-9.1	750	1	0	3	768.6	0	74	183.84	184	110	768.6	1.7	0.137	0	0	0	0	0	0	0	8	15.999	16	8	1314	3.5	0.074	1	74	183.84	184	110	231.84	1	3	2.36	2.36	0.786667	6	74	2	6	36	0.2	6	7.2
95	50	179.6	-9.1	1000	1	0	3	768.6	0	74	183.84	184	110	768.6	1.7	0.137	0	0	0	0	0	0	0	8	15.999	16	8	1314	3.5	0.074	1	74	183.84	184	110	231.84	1	3	2.36	2.36	0.786667	6	74	2	6	36	0.2	6	7.2
96	50	179.6	-9.1	1500	1	0	3	768.6	0	74	183.84	184	110	768.6	1.7	0.137	0	0	0	0	0	0	0	8	15.999	16	8	1314	3.5	0.074	1	74	183.84	184	110	231.84	1	3	2.36	2.36	0.786667	6	74	2	6	36	0.2	6	7.2
97	38	1222.9	-10.7	50	2	0	3	1252	0	39	88.9058	89	50	626	1.2	0.106	0	0	0	0	0	0	0	8	15.999	16	8	1314	3.5	0.074	2	39	88.9058	89	50	225.809	2	3	1.22	2.44	0.813333	3	39	2	5	18.5	0.25	3	4.625
98	38	1222.9	-10.7	100	2	0	3	1252	0	39	88.9058	89	50	626	1.2	0.106	0	0	0	0	0	0	0	8	15.999	16	8	1314	3.5	0.074	2	39	88.9058	89	50	225.809	2	3	1.22	2.44	0.813333	3	39	2	5	18.5	0.25	3	4.625
99	38	1222.9	-10.7	250	2	0	3	1252	0	39	88.9058	89	50	626	1.2	0.106	0	0	0	0	0	0	0	8	15.999	16	8	1314	3.5	0.074	2	39	88.9058	89	50	225.809	2	3	1.22	2.44	0.813333	3	39	2	5	18.5	0.25	3	4.625
100	38	1222.9	-10.7	500	2	0	3	1252	0	39	88.9058	89	50	626	1.2	0.106	0	0	0	0	0	0	0	8	15.999	16	8	1314	3.5	0.074	2	39	88.9058	89	50	225.809	2	3	1.22	2.44	0.813333	3	39	2	5	18.5	0.25	3	4.625
101	38	1222.9	-10.7	750	2	0	3	1252	0	39	88.9058	89	50	626	1.2	0.106	0	0	0	0	0	0	0	8	15.999	16	8	1314	3.5	0.074	2	39	88.9058	89	50	225.809	2	3	1.22	2.44	0.813333	3	39	2	5	18.5	0.25	3	4.625
102	38	1222.9	-10.7	1000	2	0	3	1252	0	39	88.9058	89	50	626	1.2	0.106	0	0	0	0	0	0	0	8	15.999	16	8	1314	3.5	0.074	2	39	88.9058	89	50	225.809	2	3	1.22	2.44	0.813333	3	39	2	5	18.5	0.25	3	4.625
103	38	1222.9	-10.7	1500	2	0	3	1252	0	39	88.9058	89	50	626	1.2	0.106	0	0	0	0	0	0	0	8	15.999	16	8	1314	3.5	0.074	2	39	88.9058	89	50	225.809	2	3	1.22	2.44	0.813333	3	39	2	5	18.5	0.25	3	4.625
104	71	188.9	-10.8	50	1	0	1	904.5	0	30	65.38	65	35	904.5	1.6	0.138	0	0	0	0	0	0	0	8	15.999	16	8	1314	3.5	0.074	1	30	65.38	65	35	81.379	1	1	1.65	1.65	1.65	2	30	2	4	14	0.333333	2	4.66667
105	71	188.9	-10.8	100	1	0	1	904.5	0	30	65.38	65	35	904.5	1.6	0.138	0	0	0	0	0	0	0	8	15.999	16	8	1314	3.5	0.074	1	30	65.38	65	35	81.379	1	1	1.65	1.65	1.65	2	30	2	4	14	0.333333	2	4.66667
106	71	188.9	-10.8	250	1	0	1	904.5	0	30	65.38	65	35	904.5	1.6	0.138	0	0	0	0	0	0	0	8	15.999	16	8	1314	3.5	0.074	1	30	65.38	65	35	81.379	1	1	1.65	1.65	1.65	2	30	2	4	14	0.333333	2	4.66667
107	71	188.9	-10.8	500	1	0	1	904.5	0	30	65.38	65	35	904.5	1.6	0.138	0	0	0	0	0	0	0	8	15.999	16	8	1314	3.5	0.074	1	30	65.38	65	35	81.379	1	1	1.65	1.65	1.65	2	30	2	4	14	0.333333	2	4.66667
108	71	188.9	-10.8	750	1	0	1	904.5	0	30	65.38	65	35	904.5	1.6	0.138	0	0	0	0	0	0	0	8	15.999	16	8	1314	3.5	0.074	1	30	65.38	65	35	81.379	1	1	1.65	1.65	1.65	2	30	2	4	14	0.333333	2	4.66667
109	71	188.9	-10.8	1000	1	0	1	904.5	0	30	65.38	65	35	904.5	1.6	0.138	0	0	0	0	0	0	0	8	15.999	16	8	1314	3.5	0.074	1	30	65.38	65	35	81.379	1	1	1.65	1.65	1.65	2	30	2	4	14	0.333333	2	4.66667
110	71	188.9	-10.8	1500	1	0	1	904.5	0	30	65.38	65	35	904.5	1.6	0.138	0	0	0	0	0	0	0	8	15.999	16	8	1314	3.5	0.074	1	30	65.38	65	35	81.379	1	1	1.65	1.65	1.65	2	30	2	4	14	0.333333	2	4.66667
111	46.7	661.4	-8.5	50	1	0	2	669	0	40	91.224	91	51	669	1.2	0.16	0	0	0	0	0	0	0	8	15.999	16	8	1314	3.5	0.074	1	40	91.224	91	51	123.222	1	2	1.33	1.33	0.665	4	40	2	5	19	0.25	4	4.75
112	46.7	661.4	-8.5	100	1	0	2	669	0	40	91.224	91	51	669	1.2	0.16	0	0	0	0	0	0	0	8	15.999	16	8	1314	3.5	0.074	1	40	91.224	91	51	123.222	1	2	1.33	1.33	0.665	4	40	2	5	19	0.25	4	4.75
113	46.7	661.4	-8.5	250	1	0	2	669	0	40	91.224	91	51	669	1.2	0.16	0	0	0	0	0	0	0	8	15.999	16	8	1314	3.5	0.074	1	40	91.224	91	51	123.222	1	2	1.33	1.33	0.665	4	40	2	5	19	0.25	4	4.75
114	46.7	661.4	-8.5	500	1	0	2	669	0	40	91.224	91	51	669	1.2	0.16	0	0	0	0	0	0	0	8	15.999	16	8	1314	3.5	0.074	1	40	91.224	91	51	123.222	1	2	1.33	1.33	0.665	4	40	2	5	19	0.25	4	4.75
115	46.7	661.4	-8.5	750	1	0	2	669	0	40	91.224	91	51	669	1.2	0.16	0	0	0	0	0	0	0	8	15.999	16	8	1314	3.5	0.074	1	40	91.224	91	51	123.222	1	2	1.33	1.33	0.665	4	40	2	5	19	0.25	4	4.75
116	46.7	661.4	-8.5	1000	1	0	2	669	0	40	91.224	91	51	669	1.2	0.16	0	0	0	0	0	0	0	8	15.999	16	8	1314	3.5	0.074	1	40	91.224	91	51	123.222	1	2	1.33	1.33	0.665	4	40	2	5	19	0.25	4	4.75
117	46.7	661.4	-8.5	1500	1	0	2	669	0	40	91.224	91	51	669	1.2	0.16	0	0	0	0	0	0	0	8	15.999	16	8	1314	3.5	0.074	1	40	91.224	91	51	123.222	1	2	1.33	1.33	0.665	4	40	2	5	19	0.25	4	4.75
		Colour represents the test set compounds
[truncated: 25 more columns]
